# Supplementary material for: Astrocytes Are More Vulnerable than Neurons to Silicon Dioxide Nanoparticle Toxicity in Vitro
Source: PubMed Central journal article supplement (PMC7560395; doi:10.3390/toxics8030051), 2020-07-29
Supplement: toxics-08-00051-s001.pdf [file toxics-08-00051-s001.pdf]

# Supplementary Materials: Astrocytes are More Vulnerable than Neurons to Silicon Dioxide Nanoparticle Toxicity in Vitro

Jorge Humberto Limón-Pacheco, Natalie Jiménez-Barrios, Alejandro Déciga-Alcaraz, Adriana Martínez-Cuazitl, Mónica Maribel Mata-Miranda, Gustavo Jesús Vázquez-Zapién, Jose Pedraza-Chaverri <sup>5</sup>, Yolanda Irasema Chirino and Marisol Orozco-Ibarra

**Table S1.** Spectral bands ( $\text{cm}^{-1}$ ) of chemical bonds of biomolecules detected by ATR-FTIR Spectroscopy in rat astrocytes and neurons exposed to  $\text{SiO}_2$ -NPs.

| Cell Type                                  | Chemical Bonds (Vibration)                     | Concentration of $\text{SiO}_2$ NPs |         |          |          |          |           |
|--------------------------------------------|------------------------------------------------|-------------------------------------|---------|----------|----------|----------|-----------|
|                                            |                                                | 0 mg/mL                             | 1 mg/mL | 10 mg/mL | 25 mg/mL | 50 mg/mL | 100 mg/mL |
| Spectral bands wavenumber $\text{cm}^{-1}$ |                                                |                                     |         |          |          |          |           |
| <b>Astrocytes</b>                          |                                                |                                     |         |          |          |          |           |
|                                            | -OH stretching                                 | 3293                                | 3294    | 3296     | 3297     | 3299     | 3302      |
|                                            | Asymmetric $-\text{CH}_2$ acyl chains (lipids) | 2926                                | 2924    | 2924     | 2924     | 2925     | 2925      |
|                                            | Symmetric $-\text{CH}_2$ (lipids)              | 2855                                | 2853    | 2853     | 2853     | 2856     | 2855      |
|                                            | C=O (lipids)                                   | 1744                                | 1742    | 1735     | 1740     | 1739     | 1740      |
|                                            | Amide I (mainly protein C=O stretching)        | 1650                                | 1654    | 1653     | 1654     | 1652     | 1653      |
|                                            | Amide II (protein N-H bending, C-N stretching) | 1545                                | 1545    | 1545     | 1545     | 1546     | 1545      |
|                                            | Asymmetric $\text{PO}_2^-$ (nucleic acid)      | 1237                                | 1240    | 1239     | 1237     | 1241     | 1230      |
|                                            | Symmetric $\text{PO}_2^-$ (nucleic acid)       | 1090                                | 1087    | 1086     | 1086     | 1088     | 1089      |
| <b>Neurons</b>                             |                                                |                                     |         |          |          |          |           |
|                                            | -OH stretching                                 | 3290                                | 3291    | 3290     | 3290     | 3290     | 3290      |
|                                            | Asymmetric $-\text{CH}_2$ acyl chains (lipids) | 2923                                | 2923    | 2923     | 2923     | 2923     | 2923      |
|                                            | Symmetric $-\text{CH}_2$ (lipids)              | 2852                                | 2852    | 2852     | 2852     | 2852     | 2852      |
|                                            | C=O (lipids)                                   | 1740                                | 1741    | 1741     | 1741     | 1741     | 1740      |

|                                                |      |      |      |      |      |      |
|------------------------------------------------|------|------|------|------|------|------|
| Amide I (mainly protein C=O stretching)        | 1652 | 1653 | 1652 | 1652 | 1652 | 1653 |
| Amide II (protein N-H bending, C-N stretching) | 1545 | 1544 | 1544 | 1544 | 1544 | 1544 |
| Asymmetric PO <sub>2</sub> (nucleic acid)      | 1237 | 1237 | 1237 | 1237 | 1237 | 1236 |

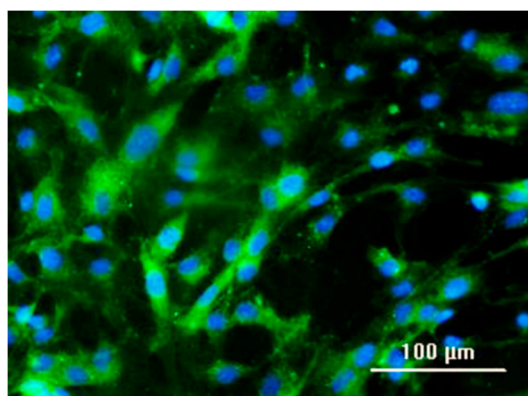

(a)

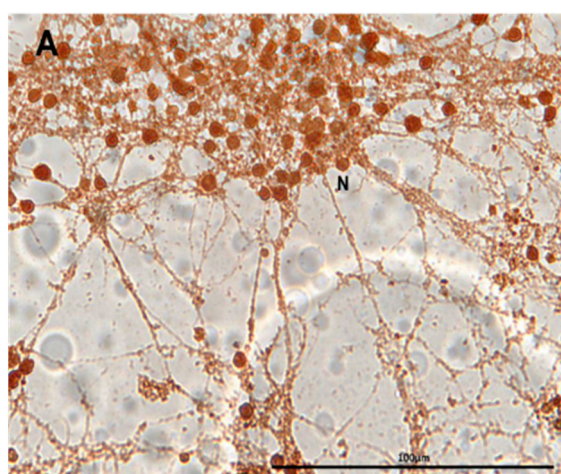

(b)

**Figure S1.** Identification of cell cultures. Immunostaining of astrocyte-rich secondary cultures (a) where glial fibrillary acidic protein (GFAP) is shown in green and 4',6-diamidino-2-phenylindole (DAPI) is shown in blue for nuclei detection. As expected, most of the cells were astrocytes, as they express GFAP. Immunostaining of cerebellar granule neuron-rich cultures (b), the left micrograph shows microtubule-associated protein 2 (MAP-2) by immunocytochemistry; the right micrograph shows GFAP in green and DAPI in blue by immunofluorescence. We used the MAP-2 stain to prove that most of the cells were neurons, and the DAPI stain to count the total number of neurons. The GFAP stain exposed the glial cells that are present in the cultures. Scale bars: 100 μm.

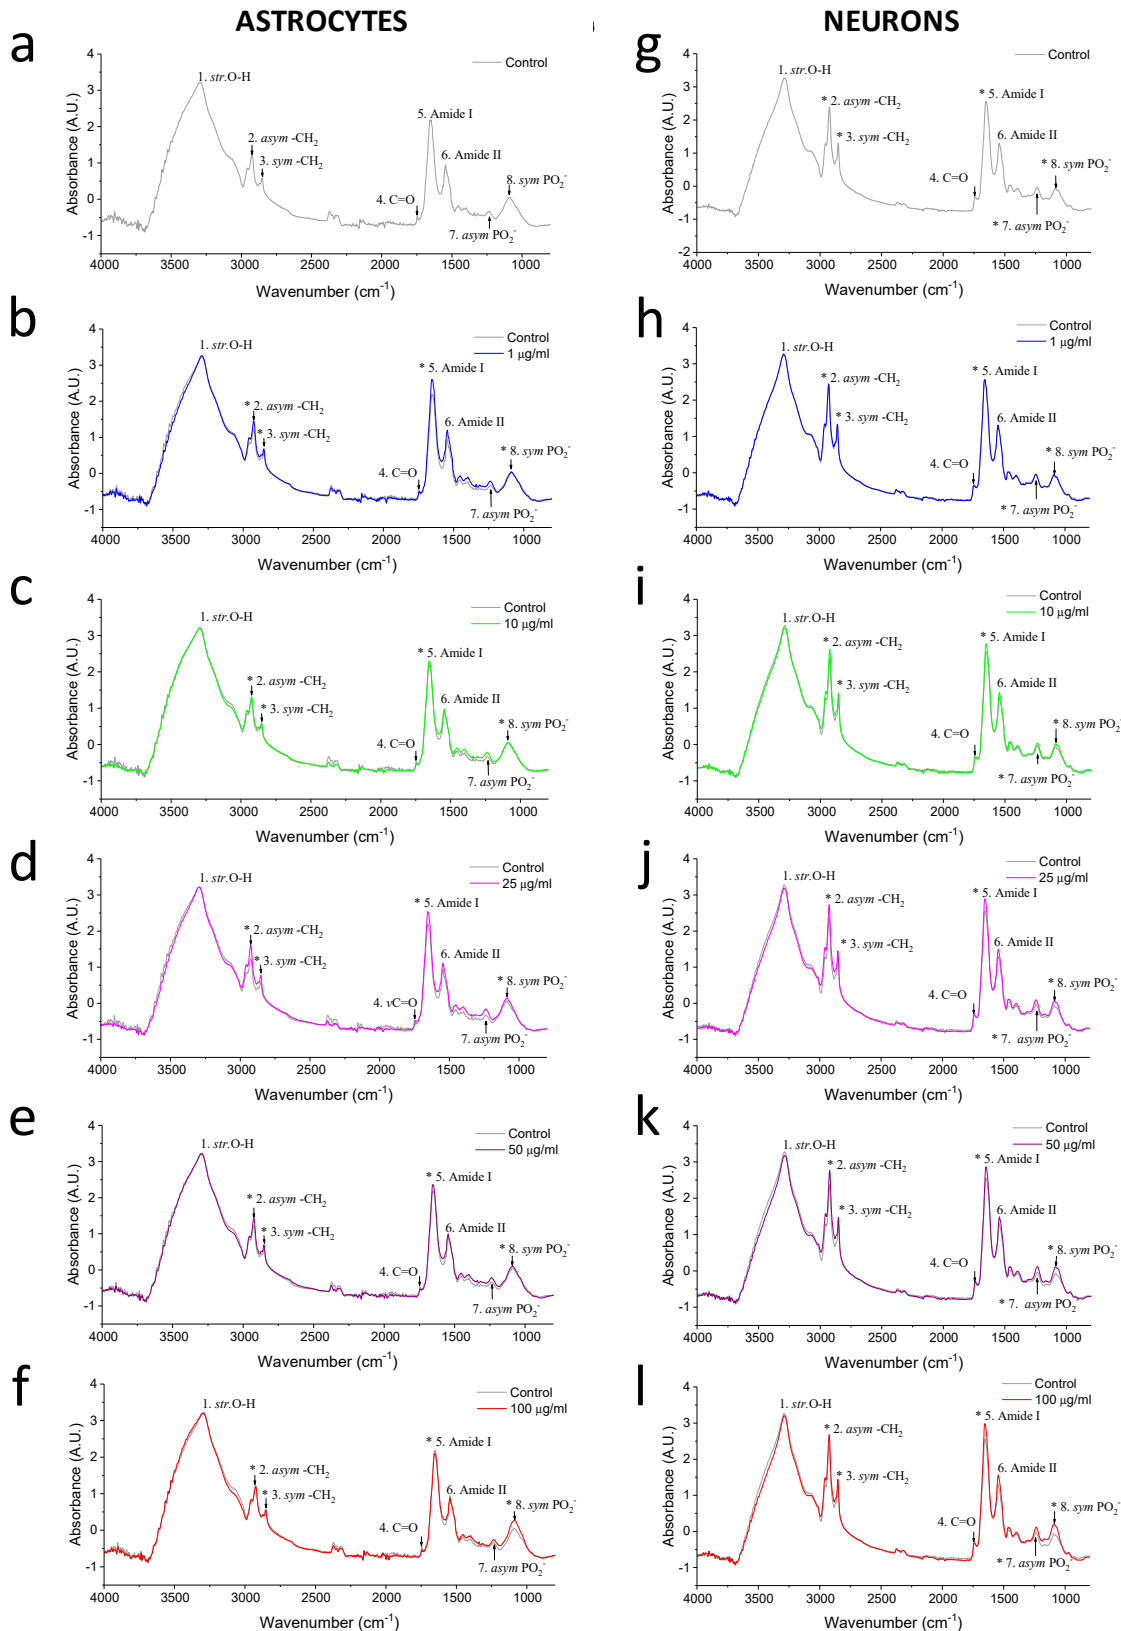

**Figure S2.** A spectral fingerprint of rat astrocytes and neurons exposed to SiO<sub>2</sub>-NPs. A sample of four µL of cells treated with SiO<sub>2</sub>-NPs for 24 h was placed onto the surface of the ATR crystal, as was described in the material and methods section. The numbers correspond to different spectral bands of chemical bonds of biomolecules of the fingerprint of the toxicity of SiO<sub>2</sub>-NPs in astrocytes (a–f) and neurons (g–l). For astrocytes, spectral bands for lipids were (1) -OH stretching at 3293–3302 cm<sup>-1</sup>, (2) asymmetric -CH<sub>2</sub> acyl chains at 2924–2926 cm<sup>-1</sup>, (3) symmetric -CH<sub>2</sub> at 2853–2855 cm<sup>-1</sup>, and (4) C=O at 1739–1744 cm<sup>-1</sup>. Spectral bands of protein region: (5) protein C=O stretching of amide I at 1650–1654

$\text{cm}^{-1}$ , and (6) protein N–H bending and C–N stretching of amide II at 1545–1546  $\text{cm}^{-1}$ . Spectral bands for nucleic acids region: (7) asymmetric  $\text{PO}_2^-$  at 1230–1241  $\text{cm}^{-1}$ , (8) symmetric  $\text{PO}_2^-$  at 1086–1090  $\text{cm}^{-1}$ . For neurons (g–l), spectral bands for lipids were (1) –OH stretching at 3290–3291  $\text{cm}^{-1}$ , (2) asymmetric – $\text{CH}_2$  acyl chains at 2923  $\text{cm}^{-1}$ , (3) symmetric – $\text{CH}_2$  at 2852  $\text{cm}^{-1}$ , and (4) C=O at 1740–1741  $\text{cm}^{-1}$ . Spectral bands of protein region: (5) protein C=O stretching of amide I at 1652–1653  $\text{cm}^{-1}$ , and (6) protein N–H bending and C–N stretching of amide II at 1544–1545  $\text{cm}^{-1}$ . Spectral bands for nucleic acids region: (7) asymmetric  $\text{PO}_2^-$  at 1236–1237  $\text{cm}^{-1}$ , (8) symmetric  $\text{PO}_2^-$  at 1088–1090  $\text{cm}^{-1}$ . The image is representative of four independent experiments with three technical replicates.

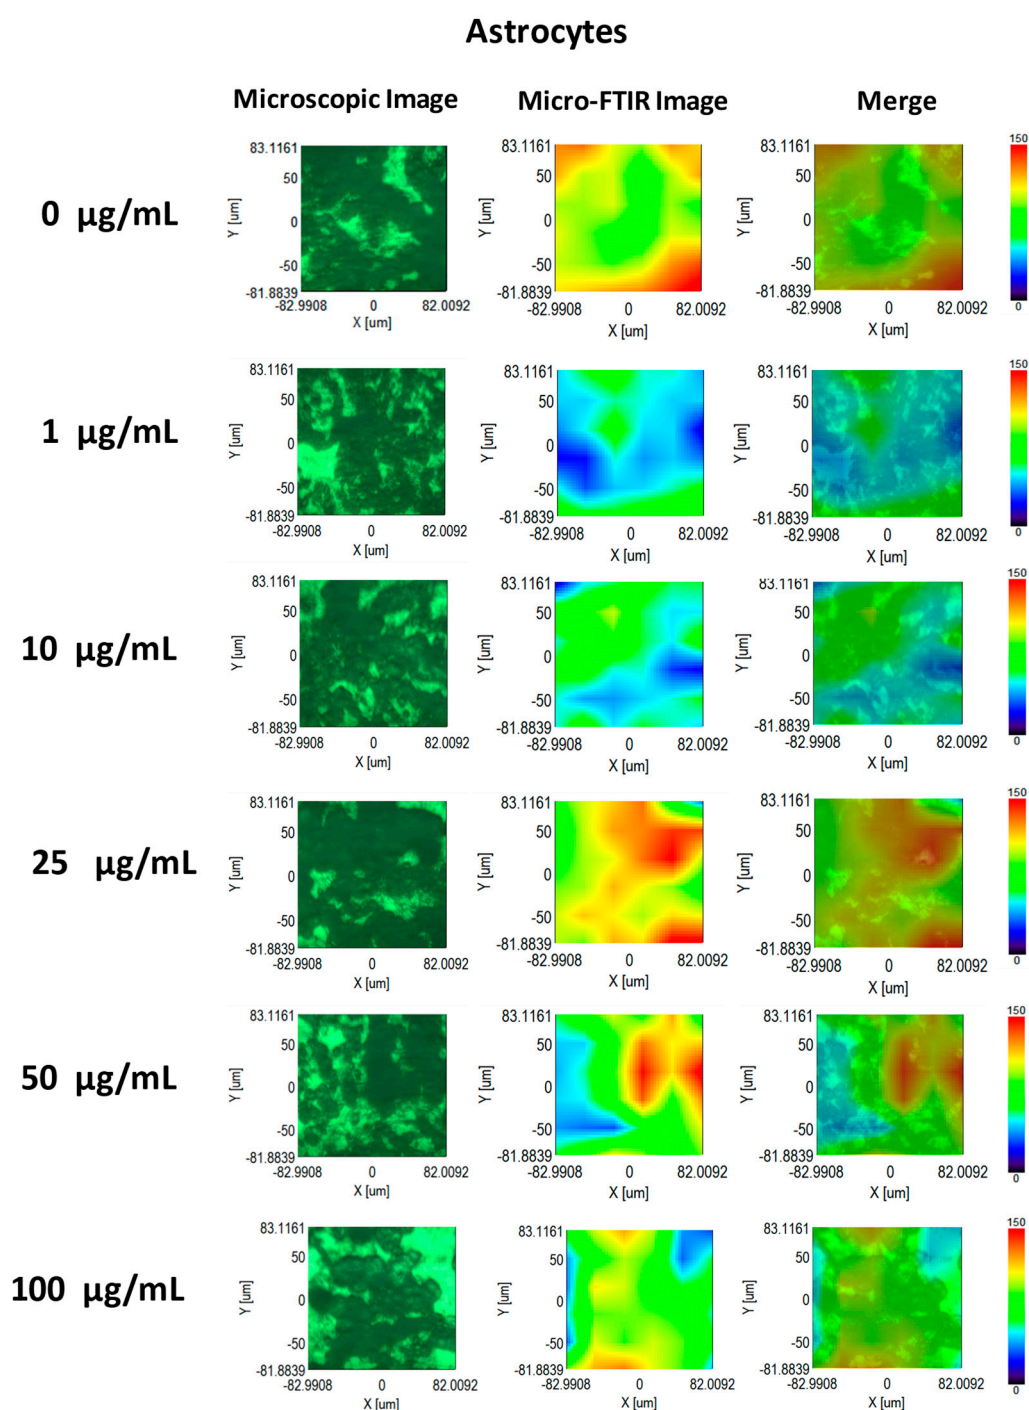

**Figure S3.** FTIR microscopy and IQ mapping analysis of the spectral region of 989–1185  $\text{cm}^{-1}$  of astrocytes exposed to  $\text{SiO}_2$ -NPs. From left to right, in the first column, the concentrations of  $\text{SiO}_2$ -NPs are indicated, in the second column, a representative image of the astrocytes from each experimental concentration observed in the FTIR microscope in bright field mode is shown. The third column



shows the images using the IQ mapping for the spectral region of 989–1185  $\text{cm}^{-1}$ , which includes the spectral band 1090  $\text{cm}^{-1}$  of the symmetric  $\text{PO}_2^-$  DNA and the 1083  $\text{cm}^{-1}$  band that represents the asymmetric stretching Si-O-Si vibration. Merge of the bright field, and IQ mapping mode is shown in the fourth (right) column, and a decrease in the signal can be seen at concentrations of 1, and 10  $\mu\text{g}/\text{mL}$   $\text{SiO}_2$ -NPs and recovery in at 25–100  $\mu\text{g}/\text{mL}$  similar to control (right column) is observed. A representative image of 4 independent experiments performed in duplicate for each concentration is shown.

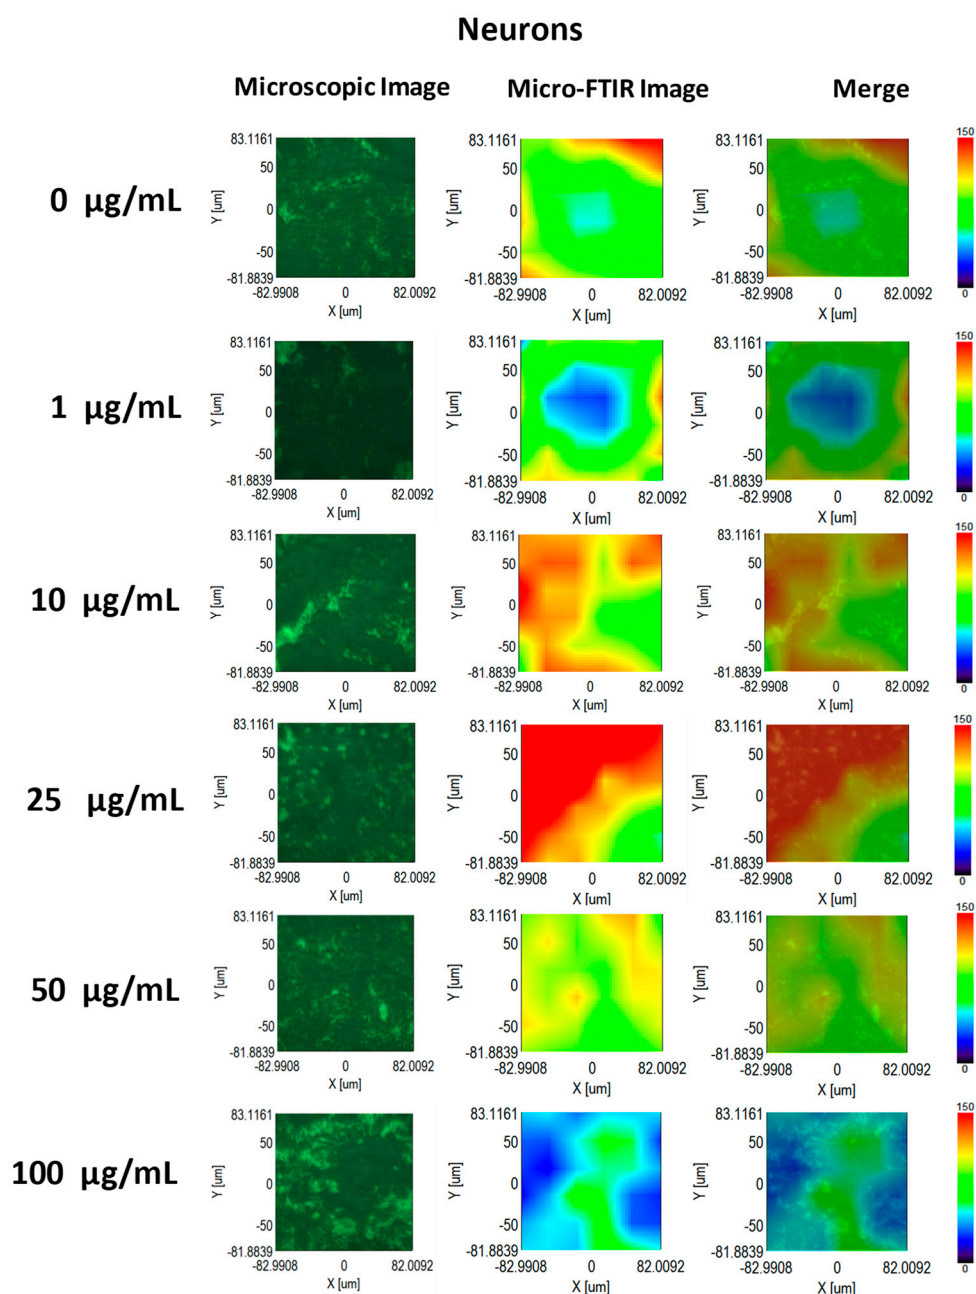

**Figure S4.** FTIR microscopy and IQ mapping analysis of the spectral region of 989–1185  $\text{cm}^{-1}$  of astrocytes exposed to  $\text{SiO}_2$ -NPs. FTIR microscopy analysis and IQ mapping of neurons exposed to  $\text{SiO}_2$ -NPs. From left to right, in the first column, the concentrations of  $\text{SiO}_2$ -NPs are indicated; in the second column, a representative image of neurons observed under the FTIR microscope in bright field mode is shown. The third column shows the image using the IQ mapping mode for the spectral region of 989–1185  $\text{cm}^{-1}$ , which includes the spectral band 1090  $\text{cm}^{-1}$  of the symmetric  $\text{PO}_2^-$  DNA and the 1083  $\text{cm}^{-1}$  band of the asymmetric stretching Si-O-Si vibration. Merge showed a slight increase in the

spectral signal at the concentrations of 25 and 50  $\mu\text{g/mL}$   $\text{SiO}_2\text{-NPs}$  (right column). The image is representative of 4 independent experiments performed in duplicate.
